# Supplementary material for: Changes in Physical Activity Following a Genetic-Based Internet-Delivered Personalized Intervention: Randomized Controlled Trial (Food4Me)
Source: PubMed Central journal article supplement (PMC4761101; doi:10.2196/jmir.5198), 2016-02-05
Supplement: jmir_v18i2e30_app2.pdf [file jmir_v18i2e30_app2.pdf]

| Variables                                   |                | Level 3                  |                           | Level 0 (controls)       |                           | Interaction<br>Level × <i>FTO</i><br>risk status | <i>P-values</i>      |                                          |
|---------------------------------------------|----------------|--------------------------|---------------------------|--------------------------|---------------------------|--------------------------------------------------|----------------------|------------------------------------------|
|                                             |                | <i>FTO</i> risk<br>AA/AT | <i>FTO</i> non-risk<br>TT | <i>FTO</i> risk<br>AA/AT | <i>FTO</i> non-risk<br>TT |                                                  | Main effect<br>Level | Main effect<br><i>FTO</i> risk<br>status |
|                                             |                | <i>n</i> =91             | <i>n</i> =39              | <i>n</i> =93             | <i>n</i> =42              |                                                  |                      |                                          |
| <b>Objective PA</b>                         |                |                          |                           |                          |                           |                                                  |                      |                                          |
| Daily PAL                                   | <i>Month 0</i> | 1.64 (0.10)              | 1.67 (0.08)               | 1.64 (0.10)              | 1.68 (0.08)               | .70                                              | .65                  | .47                                      |
|                                             | <i>Month 6</i> | 1.66 (0.14)              | 1.70 (0.13)               | 1.66 (0.14)              | 1.70 (0.13)               |                                                  |                      |                                          |
| Moderate PA<br>(min.week <sup>-1</sup> )    | <i>Month 0</i> | 174 (124)                | 209 (98)                  | 167 (117)                | 214 (97)                  | .74                                              | .90                  | .07                                      |
|                                             | <i>Month 6</i> | 206 (146)                | 249 (120)                 | 201 (137)                | 258 (153)                 |                                                  |                      |                                          |
| Vigorous PA<br>(min.week <sup>-1</sup> )    | <i>Month 0</i> | 37 (54)                  | 48 (67)                   | 44 (70)                  | 54 (65)                   | .59                                              | .68                  | .28                                      |
|                                             | <i>Month 6</i> | 49 (76)                  | 57 (89)                   | 46 (69)                  | 63 (74)                   |                                                  |                      |                                          |
| Sedentary time<br>(min.week <sup>-1</sup> ) | <i>Month 0</i> | 5449 (483)               | 5391 (479)                | 5449 (519)               | 5202 (440)                | .87                                              | .20                  | .80                                      |
|                                             | <i>Month 6</i> | 5271 (606)               | 5153 (449)                | 5277 (516)               | 5034 (493)                |                                                  |                      |                                          |
| <b>Self-reported PA</b>                     |                |                          |                           |                          |                           |                                                  |                      |                                          |
| Total activity<br>index                     | <i>Month 0</i> | 7.46 (1.49)              | 7.51 (1.31)               | 7.42 (1.40)              | 7.78 (1.21)               | .68                                              | <b>.007</b>          | .76                                      |
|                                             | <i>Month 6</i> | 8.00 (1.37)              | 7.89 (0.99)               | 7.50 (1.39)              | 7.94 (1.16)               |                                                  |                      |                                          |

Data are presented as mean (SD). *FTO*, fat mass- and obesity-associated gene
